# Supplementary material for: Determining chemospecificity in reactions with chain transfer agent and corresponding radical via evaluation of molecular weight dependency of apparent comonomer reactivity ratios: free-radical copolymerization of vinyl acetate and dibutyl maleate
Source: Royal Society of Chemistry journal article supplement (doi:10.1039/c6ra21888a), 2016-01-01
Supplement: c6ra21888a1.pdf [file c6ra21888a1.pdf]

### Electronic Supplementary Information

**Table S1.** Copolymerization data for classic approach obtained from on-line <sup>1</sup>H-NMR kinetic experiments for free radical solution copolymerization of VAc/DBM system at 60°C

| $f_{VAc}(t)$ | $F_{VAc}(\Delta t')$ | $x(\Delta t')$ |
|--------------|----------------------|----------------|
| <b>VD1</b>   |                      |                |
| 0.7143       | 0.5660               | 0.0755         |
| 0.7143       | 0.5849               | 0.1176         |
| 0.7143       | 0.6096               | 0.3482         |
| 0.7143       | 0.6114               | 0.3673         |
| 0.7143       | 0.6163               | 0.4241         |
| 0.7143       | 0.6143               | 0.4381         |
| 0.7143       | 0.6126               | 0.4534         |
| 0.7143       | 0.6162               | 0.4750         |
| <b>VD2</b>   |                      |                |
| 0.8333       | 0.6622               | 0.0590         |
| 0.8333       | 0.6646               | 0.1204         |
| 0.8333       | 0.6515               | 0.1654         |
| 0.8333       | 0.6770               | 0.2394         |
| 0.8333       | 0.6725               | 0.2582         |
| 0.8333       | 0.6784               | 0.2804         |
| 0.8333       | 0.6932               | 0.3256         |
| 0.8333       | 0.6896               | 0.3517         |
| 0.8333       | 0.6880               | 0.3669         |
| 0.8333       | 0.6899               | 0.3807         |
| 0.8333       | 0.6991               | 0.4005         |
| 0.8333       | 0.7048               | 0.4304         |
| 0.8333       | 0.7040               | 0.4409         |
| 0.8333       | 0.7131               | 0.4584         |
| 0.8333       | 0.7076               | 0.4673         |
| 0.8333       | 0.7144               | 0.4802         |

**Table S2.** Copolymerization data for new approach obtained from on-line  $^1\text{H-NMR}$  kinetic experiments spectra at different reaction time intervals up to medium overall monomer conversion for free radical solution copolymerization of VAc/DBM system at  $60^\circ\text{C}$

| VD1          |                      |                |              |                      |                |
|--------------|----------------------|----------------|--------------|----------------------|----------------|
| $f_{VAc}(t)$ | $F_{VAc}(\Delta t')$ | $x(\Delta t')$ | $f_{VAc}(t)$ | $F_{VAc}(\Delta t')$ | $x(\Delta t')$ |
| 0.7268       | 0.5565               | 0.0109         | 0.7561       | 0.6345               | 0.1210         |
| 0.7287       | 0.6205               | 0.0590         | 0.7561       | 0.6150               | 0.1463         |
| 0.7287       | 0.5975               | 0.0489         | 0.7561       | 0.6345               | 0.1803         |
| 0.7290       | 0.5678               | 0.0164         | 0.7648       | 0.6207               | 0.0972         |
| 0.7290       | 0.5608               | 0.0371         | 0.7648       | 0.6243               | 0.1492         |
| 0.7290       | 0.6096               | 0.0638         | 0.7648       | 0.6281               | 0.1686         |
| 0.7304       | 0.5842               | 0.0660         | 0.7681       | 0.6167               | 0.0745         |
| 0.7317       | 0.6171               | 0.0924         | 0.7681       | 0.6226               | 0.1278         |
| 0.7317       | 0.6182               | 0.1125         | 0.7681       | 0.6273               | 0.1477         |
| 0.7329       | 0.5947               | 0.0300         | 0.7729       | 0.6344               | 0.0674         |
| 0.7329       | 0.6036               | 0.0750         | 0.7729       | 0.6393               | 0.1558         |
| 0.7329       | 0.6078               | 0.0955         | 0.7729       | 0.6401               | 0.1821         |
| 0.7355       | 0.5913               | 0.1100         | 0.7803       | 0.6310               | 0.0575         |
| 0.7371       | 0.6095               | 0.0465         | 0.7803       | 0.6381               | 0.0791         |
| 0.7371       | 0.6137               | 0.0675         | 0.7829       | 0.6430               | 0.0948         |
| 0.7371       | 0.5622               | 0.0846         | 0.7829       | 0.6435               | 0.1229         |
| 0.7371       | 0.6246               | 0.1321         | 0.7829       | 0.6444               | 0.1508         |
| 0.7407       | 0.5768               | 0.0765         | 0.7829       | 0.6381               | 0.1790         |
| 0.7407       | 0.5984               | 0.0980         | 0.7975       | 0.6451               | 0.0311         |
| 0.7434       | 0.6230               | 0.0221         | 0.7975       | 0.6466               | 0.0618         |
| 0.7543       | 0.6266               | 0.0764         | 0.7975       | 0.6326               | 0.0930         |
| 0.7543       | 0.6234               | 0.1662         | 0.8024       | 0.6481               | 0.0317         |
| 0.7561       | 0.6052               | 0.0544         | 0.8024       | 0.6263               | 0.0639         |
| 0.7561       | 0.6134               | 0.0775         | 0.8075       | 0.6048               | 0.0333         |

Table S2. Continued

| VD2          |                      |                |              |                      |                |
|--------------|----------------------|----------------|--------------|----------------------|----------------|
| $f_{VAc}(t)$ | $F_{VAc}(\Delta t')$ | $x(\Delta t')$ | $f_{VAc}(t)$ | $F_{VAc}(\Delta t')$ | $x(\Delta t')$ |
| 0.8333       | 0.6788               | 0.0537         | 0.8973       | 0.7451               | 0.1235         |
| 0.8333       | 0.6804               | 0.1171         | 0.8973       | 0.7406               | 0.1468         |
| 0.8346       | 0.6374               | 0.0232         | 0.8973       | 0.7363               | 0.1645         |
| 0.8346       | 0.6566               | 0.0405         | 0.9025       | 0.7485               | 0.0950         |
| 0.8346       | 0.6721               | 0.1048         | 0.9025       | 0.7421               | 0.1191         |
| 0.8346       | 0.6783               | 0.1356         | 0.9079       | 0.7556               | 0.0393         |
| 0.8393       | 0.6820               | 0.0835         | 0.9079       | 0.7622               | 0.1010         |
| 0.8421       | 0.6818               | 0.0669         | 0.9079       | 0.7526               | 0.1195         |
| 0.8471       | 0.6548               | 0.0327         | 0.9079       | 0.7577               | 0.1447         |
| 0.8471       | 0.6772               | 0.0660         | 0.9079       | 0.7679               | 0.1756         |
| 0.8471       | 0.6970               | 0.1598         | 0.9141       | 0.7664               | 0.0642         |
| 0.8471       | 0.6938               | 0.1830         | 0.9141       | 0.7511               | 0.0836         |
| 0.8643       | 0.6966               | 0.0927         | 0.9141       | 0.7585               | 0.1098         |
| 0.8643       | 0.7116               | 0.1309         | 0.9141       | 0.7715               | 0.1419         |
| 0.8696       | 0.7012               | 0.0954         | 0.9141       | 0.7763               | 0.1733         |
| 0.8696       | 0.7131               | 0.1276         | 0.9187       | 0.7698               | 0.1400         |
| 0.8696       | 0.7193               | 0.1556         | 0.9242       | 0.7758               | 0.0830         |
| 0.8696       | 0.7216               | 0.1822         | 0.9242       | 0.7822               | 0.1165         |
| 0.8757       | 0.7238               | 0.1749         | 0.9289       | 0.7818               | 0.0286         |
| 0.8814       | 0.7335               | 0.1515         | 0.9289       | 0.7998               | 0.0979         |
| 0.8814       | 0.7375               | 0.1848         | 0.9289       | 0.7927               | 0.1468         |
| 0.8873       | 0.7280               | 0.1142         | 0.9289       | 0.8078               | 0.1736         |
| 0.8873       | 0.7344               | 0.1490         | 0.9333       | 0.8129               | 0.1492         |
| 0.8873       | 0.7461               | 0.1819         | 0.9333       | 0.8180               | 0.1761         |
| 0.8925       | 0.7189               | 0.0815         | 0.9376       | 0.7980               | 0.0366         |
| 0.8925       | 0.7302               | 0.1175         | 0.9376       | 0.8119               | 0.1174         |
| 0.8925       | 0.7457               | 0.1516         | 0.9376       | 0.8185               | 0.1453         |
| 0.8925       | 0.7419               | 0.1742         | 0.9430       | 0.8182               | 0.0839         |
| 0.8973       | 0.7354               | 0.0315         | 0.9430       | 0.8254               | 0.1128         |
| 0.8973       | 0.7236               | 0.0883         |              |                      |                |
